# Supplementary material
Source: PubMed Central journal article supplement (PMC8582005)
Supplement: NIHMS1642579-supplement-1.pdf [file NIHMS1642579-supplement-1.pdf]

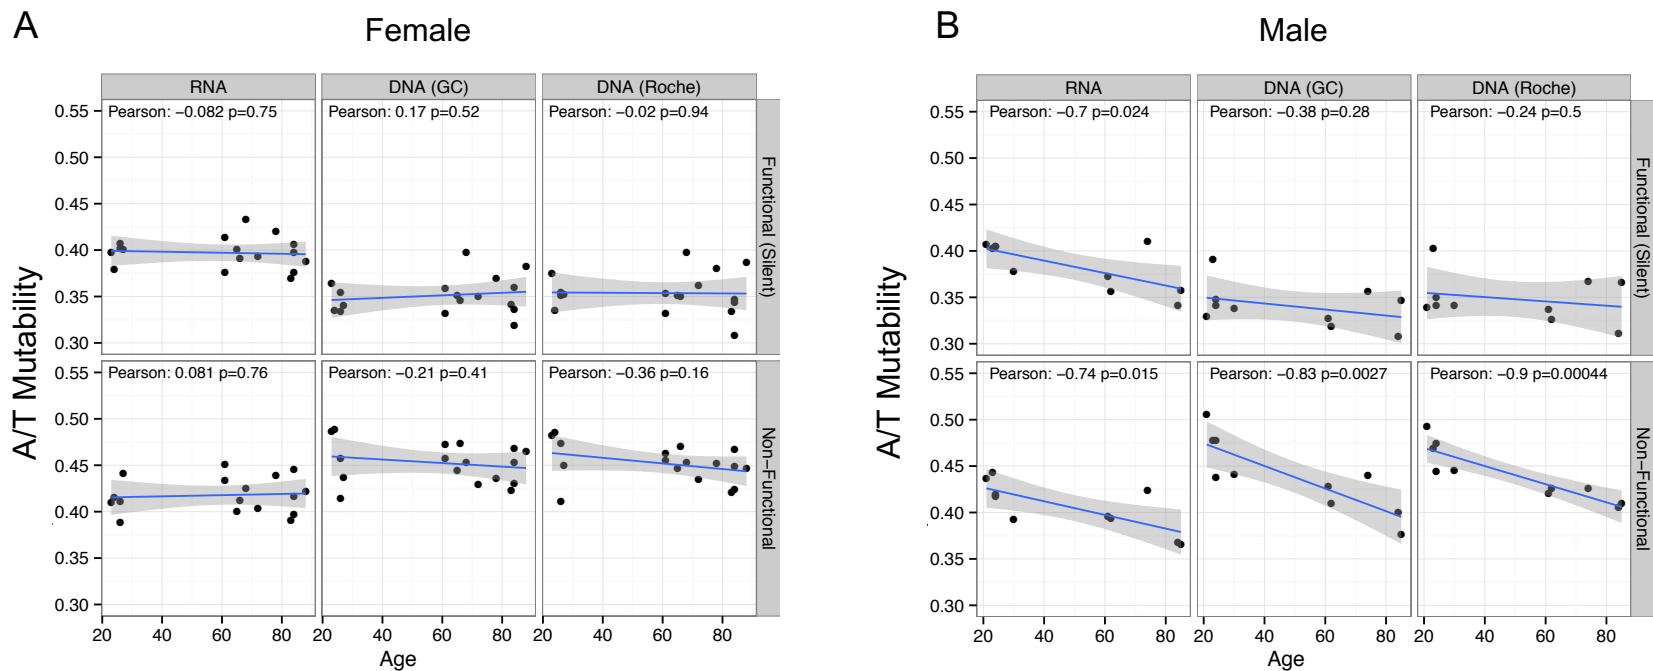

**Figure S1:** Relationship between A/T mutability and age across all three replicates in Figure 2. Each point denotes an individual. Line of best fit and standard deviation are indicated.

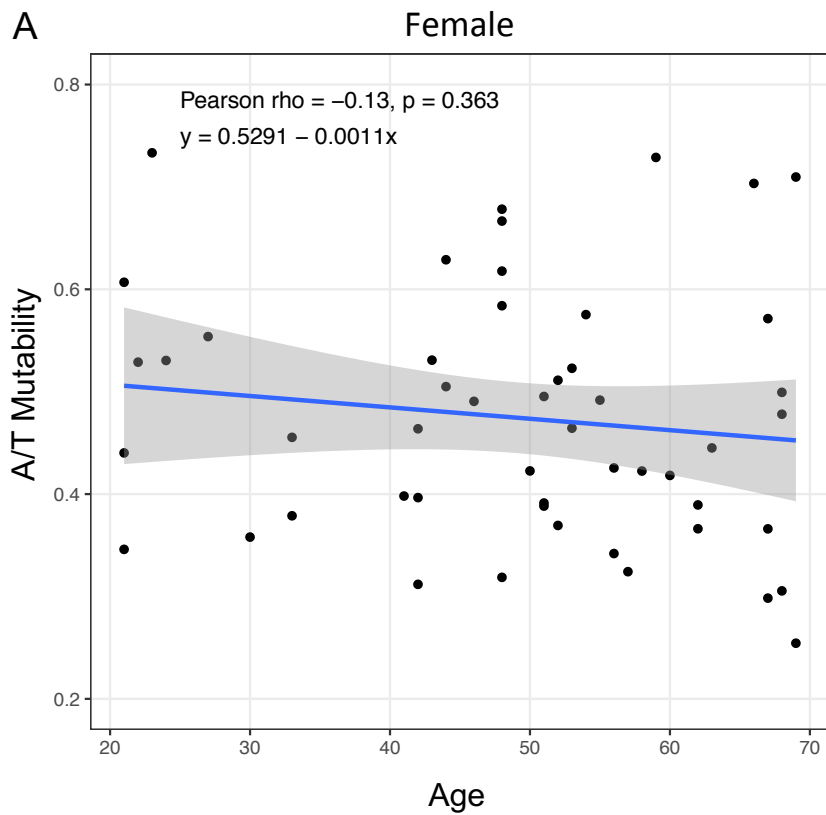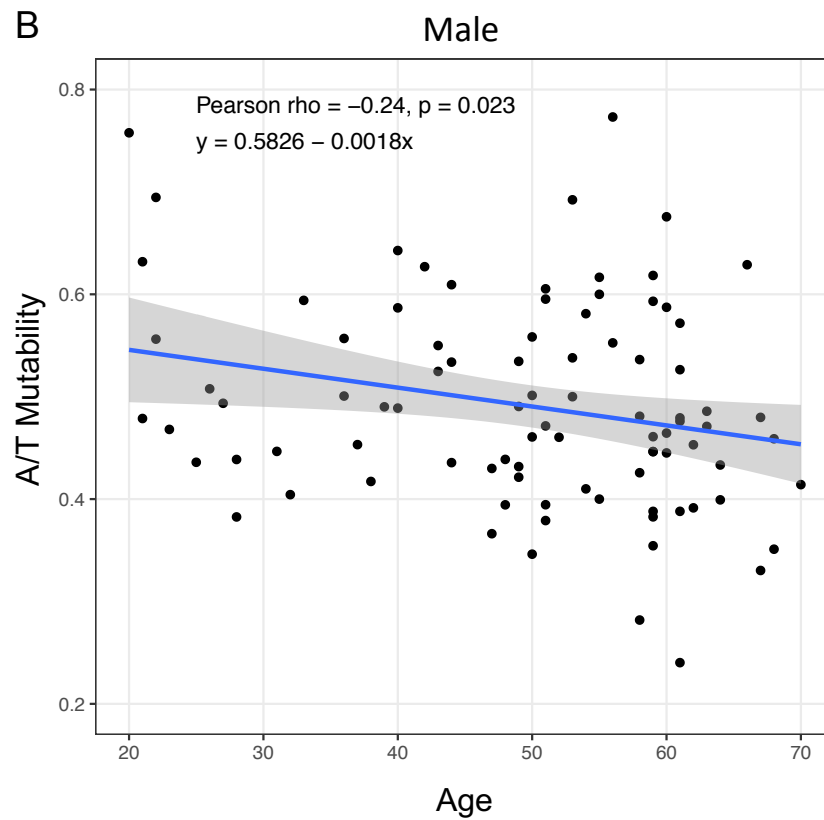

**Figure S2:** Relationship between A/T mutability and age in the GTEx dataset in A) females, and B) males. Each point denotes an individual. Line of best fit and standard deviation are indicated.

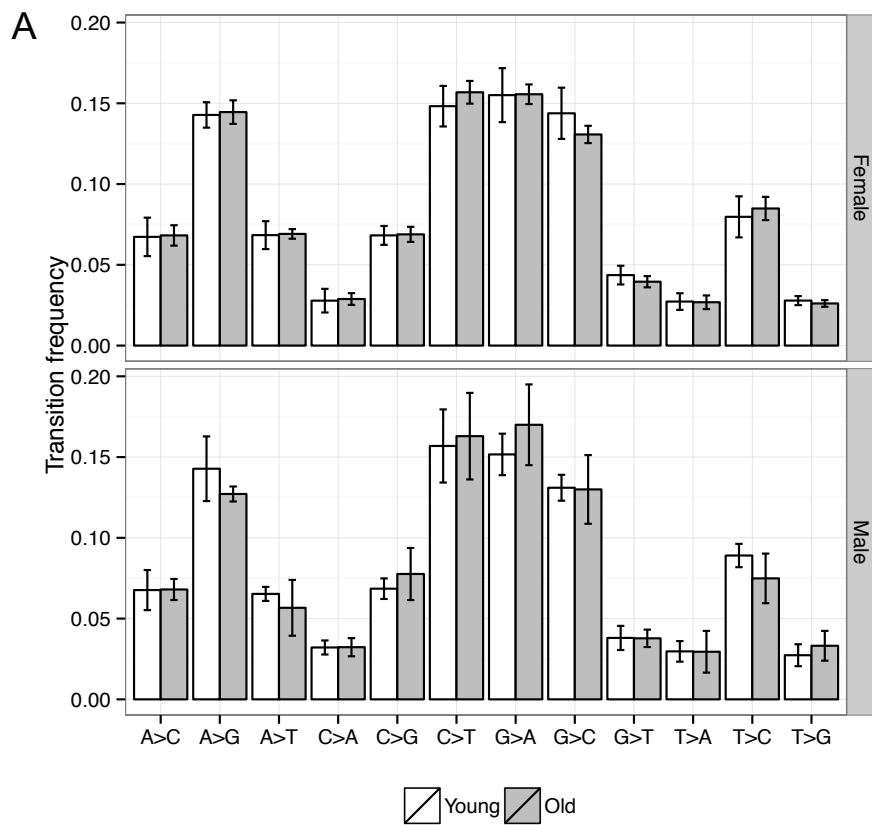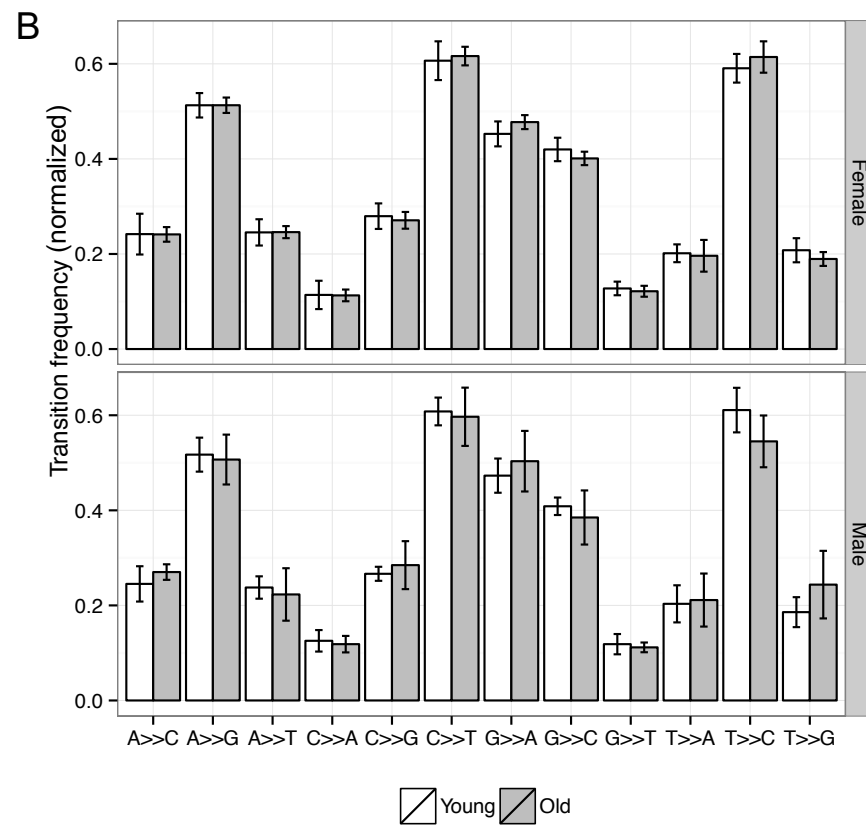

**Figure S3:** Comparison of substitution frequencies between age groups in the AIRR-seq dataset: A) not normalized per base, B) normalized per base.

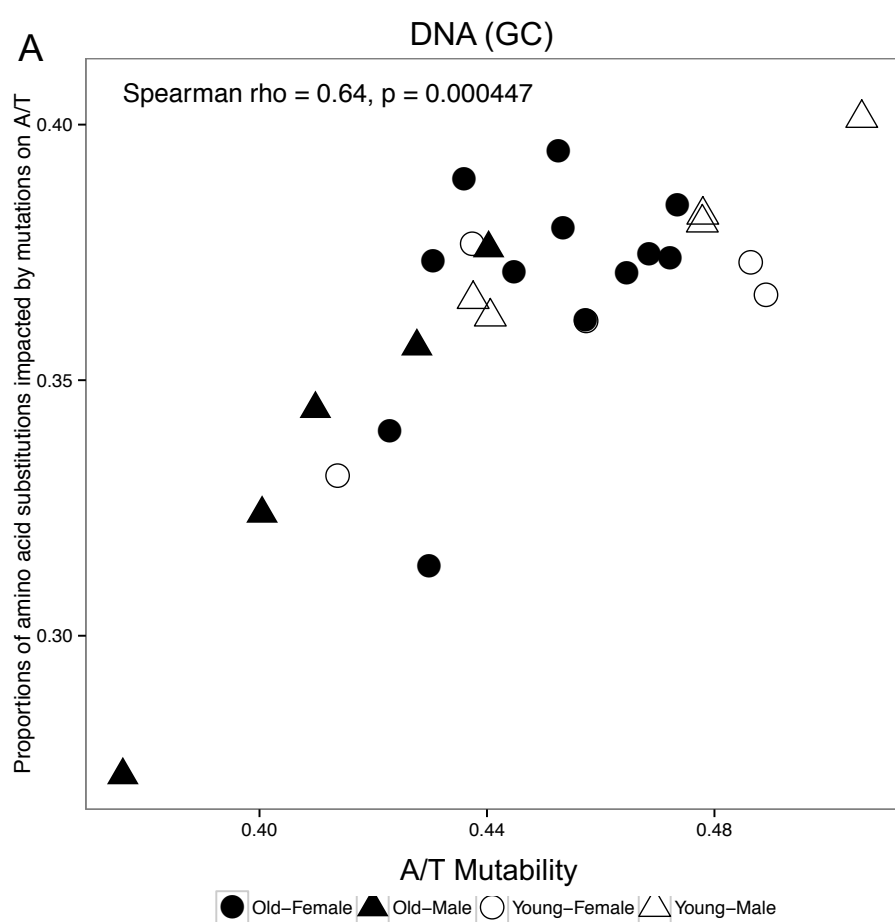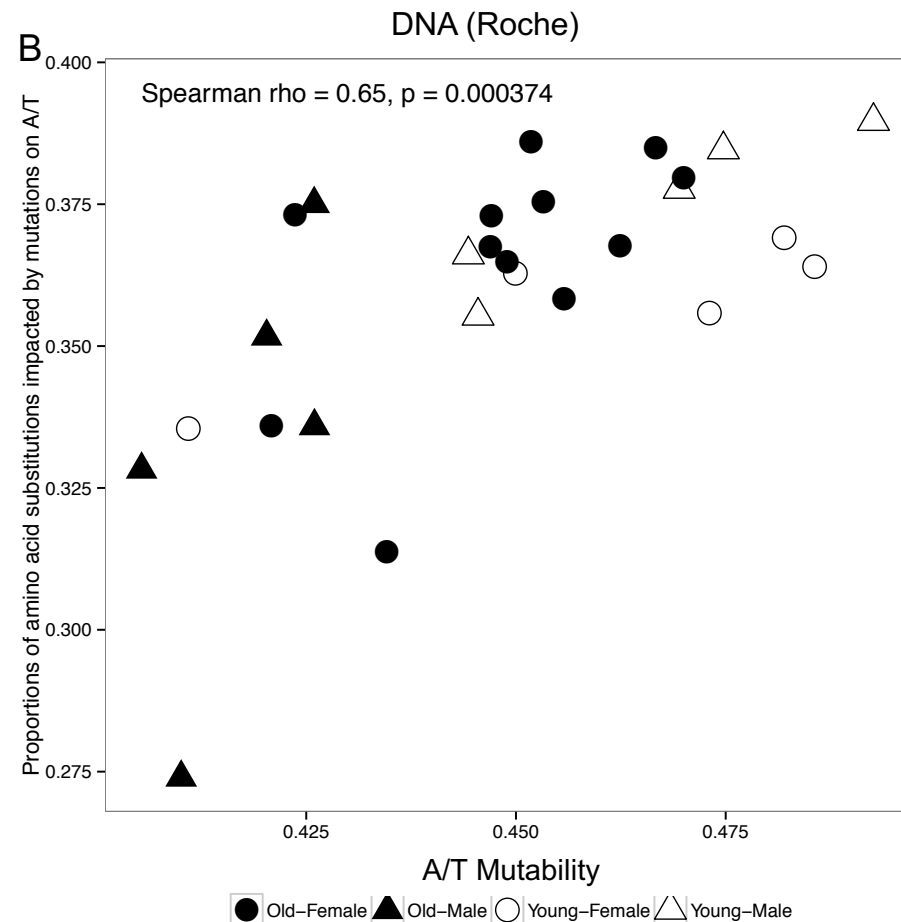

**Figure S4:** Continuation of Figure 3 for the A) DNA-GC and B) DNA-Roche replicate in the AIRR-seq dataset.
